# Supplementary material for: Child Mortality Estimation: Appropriate Time Periods for Child Mortality Estimates from Full Birth Histories
Source: PLoS Med. 2012 Aug 28;9(8):e1001289. doi: 10.1371/journal.pmed.1001289 (PMC3429388; doi:10.1371/journal.pmed.1001289)
Supplement: Table S1 — Number of contiguous years from survey date allowing estimates of mortality with coefficient of variation less than 10%. (XLS) [file pmed.1001289.s001.xls]

## Sheet: Sheet1
Number of contiguous years from survey date allowing estimates of mortality with coefficient of variation less than 10 percent
	Child mortality rate					Infant mortality rate					Neonatal mortality rate
Period	1 year	2 year	3 year	4 year	5 year	1 year	2 year	3 year	4 year	5 year	1 year	2 year	3 year	4 year	5 year	Total Fertility Rate	Completed households
Survey
Albania 2008-09	0	0	0	0	0	0	0	0	0	0	0	0	0	0	0	1.6	8805.13
Armenia 2000	0	0	0	0	0	0	0	0	0	0	0	0	0	0	0	1.7	6341.33
Armenia 2005	0	0	0	0	0	0	0	0	0	0	0	0	0	0	0	1.7	7247.27
Azerbaijan 2006	0	0	0	0	0	0	0	0	0	0	0	0	0	0	0	2	7451.38
Bangladesh 1993-94	26	28	30	32	30	0	26	30	32	30	0	22	27	28	30	3.4	9593.87
Bangladesh 1996-97	23	26	30	32	30	1	22	30	32	30	0	22	24	24	30	3.3	9017.11
Bangladesh 1999-00	26	26	30	32	30	0	26	33	32	30	0	2	27	28	30	3.3	10196.1
Bangladesh 2004	0	30	33	32	30	0	24	30	32	30	0	0	24	24	30	3	10789.4
Bangladesh 2007	0	0	33	32	30	0	0	30	32	30	0	0	0	28	30	2.7	10754.1
Benin 1996	20	26	27	28	30	0	20	24	28	30	0	0	0	20	20	6	4710.12
Benin 2001	17	22	24	28	30	1	16	21	24	30	0	0	0	12	20	5.6	6019.82
Benin 2006	26	28	27	28	30	20	26	27	28	30	0	18	18	24	25	5.7	17820.2
Bolivia 1989	19	24	27	24	25	0	12	21	24	25	0	0	0	4	0	5	8435.31
Bolivia 1994	22	26	27	28	30	0	22	27	28	30	0	0	0	20	20	4.8	10239.2
Bolivia 1998	23	24	27	28	25	0	22	24	24	25	0	0	18	24	25	4.2	12952.1
Bolivia 2003	26	26	30	28	30	0	26	30	28	30	0	0	0	0	25	3.8	19722.6
Bolivia 2008	0	28	27	28	30	0	26	27	28	30	0	0	0	24	25	3.5	19763
Botswana 1988	0	0	0	12	15	0	0	0	0	0	0	0	0	0	0	4.9	4470.62
Brazil 1986	0	0	15	16	20	0	0	15	16	20	0	0	0	0	0	3.4	6772.6
Brazil 1991	0	0	0	0	0	0	0	0	0	0	0	0	0	0	0	3.7	7271.77
Brazil 1996	0	0	24	28	25	0	0	24	24	25	0	0	0	0	0	2.5	15332.3
Burkina Faso 1993	21	24	27	28	30	1	16	24	24	25	0	0	0	20	20	6.5	5551.94
Burkina Faso 1998-99	25	26	30	32	30	9	24	27	28	30	0	4	9	20	25	6.4	5071.4
Burkina Faso 2003	27	28	27	28	30	14	22	27	28	30	0	0	18	20	20	5.9	9413.18
Burundi 1987	1	20	21	20	20	0	0	12	16	15	0	0	0	0	0	6.9	3868.45
Cambodia 2000	25	26	27	28	30	12	24	27	28	30	0	0	15	20	20	3.8	12707.5
Cambodia 2005	22	24	27	28	30	0	0	27	28	30	0	0	0	0	25	3.4	14745.1
Cameroon 1991	0	20	21	20	25	0	0	12	16	15	0	0	0	0	0	5.8	4143.84
Cameroon 1998	15	16	21	20	25	0	0	15	20	20	0	0	0	0	0	4.8	4910.78
Cameroon 2004	22	24	27	28	25	8	20	24	24	25	0	0	9	16	15	5	11278.7
CAR 1994-95	15	24	24	28	30	0	14	21	24	25	0	0	0	12	15	5.1	6122.05
Chad 1996-97	22	22	27	28	30	11	22	24	24	25	0	0	18	20	20	6.4	7249.52
Chad 2004	11	18	24	24	25	0	10	18	20	25	0	0	0	0	0	6.3	5478.93
Colombia 1986	0	0	0	0	0	0	0	0	0	0	0	0	0	0	0	3.2	4873
Colombia 1990	0	0	0	0	0	0	0	0	0	0	0	0	0	0	0	2.8	7874.11
Colombia 1995	0	0	0	24	25	0	0	0	12	25	0	0	0	0	0	3	10867.1
Colombia 2000	0	0	0	0	25	0	0	0	0	0	0	0	0	0	0	2.6	11747.6
Colombia 2005	0	0	27	28	30	0	0	0	28	30	0	0	0	0	0	2.4	40252.9
Colombia 2010	0	0	27	28	30	0	0	0	28	30	0	0	0	0	0	2.1	58219.4
Comoros 1996	0	0	6	20	20	0	0	0	4	20	0	0	0	0	5	4.6	2337.01
Congo(Brazzaville) 2005	0	8	12	12	25	0	0	12	12	15	0	0	0	0	0	4.8	5963.9
Congo Democratic Republic 2007	6	8	24	24	25	0	6	6	8	5	0	0	0	8	5	6.3	8938.99
Cote d'Ivoire 1994	20	24	27	28	30	0	18	24	28	25	0	0	15	20	20	5.3	6303.56
Cote d'Ivoire 1998-99	0	4	15	16	15	0	0	6	4	10	0	0	0	0	0	5.2	2253.66
Cote d'Ivoire 2005	0	2	12	12	20	0	2	3	8	10	0	0	0	0	0	4.6	4368.25
Dominican Republic 1986	0	18	24	24	25	0	0	18	24	25	0	0	0	0	10	3.815	7154.26
Dominican Republic 1991	0	0	0	0	0	0	0	0	0	0	0	0	0	0	0	3.3	7889.02
Dominican Republic 1996	0	0	21	20	20	0	0	0	20	20	0	0	0	0	0	3.2	10302.3
Dominican Republic 1999	0	0	0	0	0	0	0	0	0	0	1	0	0	0	0	2.7	1584.01
Dominican Republic 2002	0	0	0	28	30	0	0	0	28	25	0	0	0	0	0	3	33647.5
Dominican Republic 2007S	0	0	0	20	20	0	0	0	0	25	0	0	0	0	0	2.4	35023.6
Dominican Republic 2007Sp	0	0	0	0	0	0	0	0	0	0	0	0	0	0	0	2.4	35023.6
Ecuador 1987	0	0	18	20	20	0	0	18	20	20	0	0	0	0	0	4.2	4577.78
Egypt 1988	0	0	0	0	0	0	0	0	0	0	0	0	3	4	5	4.5	9801.57
Egypt 1992	26	28	30	32	30	1	26	30	28	30	0	0	0	20	20	3.9	11111.8
Egypt 1995	28	30	30	32	30	23	28	30	32	30	0	0	27	28	25	3.6	15917.6
Egypt 2000	0	30	30	32	30	0	30	30	32	30	0	0	24	28	30	3.5	17363.3
Egypt 2003	0	0	27	28	30	0	0	27	28	30	0	0	0	0	0	3.2	10089
Egypt 2005	0	28	30	32	30	0	2	30	32	30	0	0	0	28	30	3.1	22556.1
Egypt 2008	0	0	30	28	30	0	0	27	28	30	0	0	0	0	0	3	19561.3
El Salvador 1985	0	0	6	8	10	0	0	6	8	10	0	0	0	0	0	4.2	4922.15
Eritrea 1995	2	18	18	24	25	0	0	15	16	15	0	0	0	0	0	6.1	6075.33
Eritrea 2002	17	22	24	24	25	0	2	18	20	20	0	0	0	0	15	4.8	9696.29
Ethiopia 2000	26	26	30	32	30	14	24	27	28	30	0	12	0	20	25	5.5	14539.5
Ethiopia 2005	24	28	27	28	30	2	24	27	28	30	0	0	18	24	25	5.4	14425.3
Gabon 2000	0	2	15	20	25	0	0	3	16	15	0	0	0	0	0	4.2	6598.74
Ghana 1988	16	20	21	24	25	0	14	18	20	20	0	0	3	8	15	6.4	4404.84
Ghana 1993	12	18	21	24	25	0	0	15	16	20	0	0	0	0	10	5.2	6062.42
Ghana 1998	0	18	21	24	25	0	0	0	20	20	0	0	0	0	0	4.4	6317.62
Ghana 2003	0	16	21	24	25	0	0	12	20	20	0	0	0	0	0	4.4	6541.84
Ghana 2008	0	0	15	20	20	0	0	0	0	15	0	0	0	0	0	4	12187.4
Guatemala 1987	11	18	21	20	20	0	10	15	20	20	0	0	0	4	10	5.5	5461.65
Guatemala 1995	1	26	27	28	30	0	20	27	28	25	0	0	0	0	25	5.1	14045
Guatemala 1998-99	0	0	0	16	25	0	0	0	0	0	0	0	0	0	0	5	6226.27
Guinea 1999	25	28	30	28	30	13	22	24	28	30	0	2	18	20	20	5.5	5333.84
Guinea 2005	25	26	27	28	30	3	26	27	28	30	0	0	12	20	25	5.7	6428.16
Guyana 2005	0	0	0	0	0	0	0	0	0	0	0	0	0	0	0	2.6	2608.97
Haiti 1994-95	3	22	24	24	25	0	0	21	24	25	0	0	0	0	10	4.8	5297.18
Haiti 2000	1	16	15	16	15	0	2	3	16	15	0	0	0	0	0	4.7	9742.52
Haiti 2005-06	0	20	18	20	20	0	4	21	20	20	0	0	0	0	0	3.9	10268.8
Honduras 2005-06	0	24	27	28	30	0	0	24	28	30	0	0	0	20	20	3.3	20755.8
India 1992-93	31	32	33	32	30	31	32	33	32	30	29	30	33	32	30	3.4	93652
India 1998-99	30	32	33	32	30	31	34	36	32	30	29	32	33	32	30	2.8	96173
India 2005-06	30	32	33	32	30	31	32	33	32	30	28	30	33	32	30	2.7	113969
Indonesia 1987	4	4	3	12	15	0	2	21	20	20	0	0	0	4	10	3.1	14150
Indonesia 1991	25	28	30	28	30	20	26	27	28	30	0	0	24	24	25	3	27887.7
Indonesia 1994	1	28	30	28	30	0	26	27	28	30	0	0	24	24	25	2.9	35190.4
Indonesia 1997	2	28	30	32	30	0	22	27	28	30	0	0	3	24	25	2.8	34937.7
Indonesia 2002-03	0	26	30	28	20	0	0	24	28	20	0	0	0	0	10	2.6	34390.6
Indonesia 2007	0	26	27	32	30	0	0	27	28	30	0	0	0	20	20	2.6	41917.6
Jordan 1990	0	2	24	24	25	0	0	24	24	25	0	0	0	0	10	5.6	10386.8
Jordan 1997	0	0	21	20	25	0	0	3	20	20	0	0	0	0	0	4.4	7654.58
Jordan 2002	0	0	0	0	0	0	0	0	0	0	0	0	0	0	0	3.7	7888.32
Jordan 2007	0	0	0	0	0	0	0	0	0	0	0	0	0	0	0	3.6	14701.4
Jordan 2009	0	0	0	0	0	0	0	0	0	0	0	0	0	0	0	3.8	14470.5
Kazakhstan 1995	0	0	0	0	0	0	0	0	0	0	0	0	0	0	0	2.5	4421.76
Kazakhstan 1999	0	0	0	0	0	0	0	0	0	0	0	0	0	0	0	2	6181.28
Kenya 1989	0	2	21	20	20	0	2	12	20	20	0	0	3	4	5	6.7	8174.11
Kenya 1993	3	22	24	24	25	0	2	15	20	25	0	0	0	0	0	5.4	8549.66
Kenya 1998	12	20	24	24	25	0	12	12	20	25	0	0	0	0	0	4.7	9162.12
Kenya 2003	8	8	9	20	25	0	8	9	8	20	0	0	0	0	5	4.9	9500
Kenya 2008-09	0	0	0	0	0	0	0	0	0	0	0	0	0	0	0	4.6	9707.47
Kyrgyz Republic 1997	0	0	3	8	10	0	0	0	0	5	0	0	0	0	0	3.4	3798.07
Lesotho 2004	0	8	18	20	25	0	2	9	20	20	0	0	0	0	5	3.5	9427.66
Lesotho 2009	0	0	9	12	15	0	0	6	8	10	0	0	0	0	0	3.3	9394.36
Liberia 1986	19	28	27	28	30	4	22	27	28	30	0	0	12	16	20	6.7	4601.08
Liberia 2007	1	24	30	28	30	0	2	27	28	30	0	0	0	0	10	5.2	7261.81
Liberia 2009	0	0	3	4	25	0	0	0	0	0	0	0	0	0	0	5.9	4354.94
Madagascar 1992	16	18	27	28	25	2	16	18	16	20	0	0	6	8	15	6.1	6409
Madagascar 1997	20	22	24	24	25	2	20	21	20	20	0	0	0	12	15	6	7725.04
Madagascar 2003-04	0	0	0	0	20	0	0	0	0	0	0	0	0	0	0	5.2	9127.69
Madagascar 2008-09	0	8	12	12	25	0	0	0	12	10	0	0	0	0	0	4.8	18757.2
Malawi 1992	23	24	27	28	30	0	10	18	24	25	0	0	0	8	10	6.7	5718.02
Malawi 2000	26	28	30	28	30	18	26	30	28	30	0	16	18	24	25	6.3	15266.8
Malawi 2004	20	24	27	28	30	0	16	24	28	30	0	0	0	8	15	6	14710.1
Maldives 2009	0	0	0	0	0	0	0	0	0	0	0	0	0	0	0	2.5	6786.05
Mali 1987	21	26	27	28	30	0	0	18	24	25	0	0	0	0	0	7.1	3046.56
Mali 1995-96	29	30	30	32	30	24	28	30	32	30	1	24	27	28	30	6.7	9388.34
Mali 2001	27	30	30	32	30	21	26	27	28	30	1	24	27	28	25	6.8	13428.9
Mali 2006	26	28	30	32	30	20	22	21	28	30	0	20	21	24	25	6.6	13530.7
Mauritania 2000	0	0	21	24	25	0	0	0	16	15	0	0	0	0	0	4.5	6670.15
Mexico 1987	0	0	0	0	10	0	2	3	0	0	0	0	3	0	0	4	7790.31
Moldova 2005	0	0	0	0	0	0	0	0	0	0	0	0	0	0	0	1.7	11620.1
Morocco 1987	23	28	27	28	30	0	24	24	28	30	0	0	15	20	25	4.6	6958.37
Morocco 1992	0	28	30	28	30	0	0	27	28	30	0	0	0	0	0	4	6948.89
Morocco 1995	0	0	0	0	0	0	0	0	0	0	0	0	0	0	0	3.31	2750.73
Morocco 2003-04	0	0	30	28	30	0	0	30	32	30	0	0	0	24	30	2.5	11856
Mozambique 1997	1	10	15	20	20	0	0	0	16	15	0	0	0	0	0	5.2	10605.6
Mozambique 2003	26	26	30	32	30	19	24	30	28	30	0	0	9	24	25	5.5	13722.3
Namibia 1992	0	14	15	20	20	0	2	6	16	20	0	0	0	0	5	5.4	4635.56
Namibia 2000	0	2	3	4	5	0	0	0	0	0	0	0	0	0	0	4.2	6636.68
Namibia 2006-07	0	4	9	8	20	0	0	3	4	5	0	0	0	0	0	3.6	9750.66
Nepal 1996	27	28	30	32	30	0	28	30	28	30	0	16	27	28	30	4.6	8466
Nepal 2001	0	26	27	28	30	0	26	27	28	30	0	0	27	28	25	4.1	8828.54
Nepal 2006	0	26	24	24	25	0	0	27	24	30	0	0	0	0	25	3.1	8999.86
Nicaragua 1998	0	26	27	28	30	0	0	27	28	30	0	0	0	0	0	3.6	12565.7
Nicaragua 2001	0	0	27	28	30	0	0	27	28	25	0	0	0	0	0	3.2	13175.5
Niger 1992	24	26	27	28	30	12	20	21	24	25	0	0	0	20	20	7	5743.35
Niger 1998	26	28	30	32	30	18	26	27	28	30	0	0	18	20	25	7.2	6294.1
Niger 2006	24	24	30	28	30	1	20	24	24	25	0	0	0	24	25	7	8241.22
Nigeria 1986	0	4	6	8	10	0	0	0	8	10	0	0	0	0	0	5.9	3743.94
Nigeria 1990	2	24	24	24	25	0	12	21	20	25	0	2	3	12	15	6	9808.04
Nigeria 1999	17	20	24	24	25	0	16	21	24	25	0	0	6	12	15	4.7	7823.97
Nigeria 2003	20	24	27	28	25	0	18	24	24	25	0	0	0	16	15	5.7	7753.9
Nigeria 2008	29	30	30	32	30	25	30	30	32	30	16	24	27	28	30	5.7	35680.9
Pakistan 1990-91	0	8	21	24	25	0	0	15	20	25	0	0	0	8	15	4.9	7794.47
Pakistan 2006-07	17	24	30	28	30	2	24	24	24	30	0	18	24	24	25	4.1	99690.1
Paraguay 1990	0	0	0	8	5	0	0	0	0	5	0	0	0	0	0	4.7	6125.82
Peru 1986	0	12	24	24	30	0	0	18	24	30	0	0	0	0	0	4.1	6800
Peru 1991-92	23	24	27	28	30	1	22	27	28	30	0	0	15	20	20	3.5	14223
Peru 1996	26	28	30	28	30	21	26	27	28	30	0	8	21	24	25	3.5	32694
Peru 2000	25	26	27	28	30	0	26	27	28	30	0	0	0	24	25	2.8	32418.1
Peru 2004-08	0	0	0	0	0	0	0	0	0	0	0	0	0	0	0	2.5	25626.2
Philippines 1993	0	20	21	24	25	0	16	18	24	25	0	0	0	0	15	4.09	1084.17
Philippines 1998	0	22	24	24	25	0	0	15	24	25	0	0	0	12	15	3.7	13529.8
Philippines 2003	0	2	24	24	25	0	0	3	20	25	0	0	0	0	0	3.5	13788.8
Philippines 2008	0	0	21	24	25	0	0	0	20	25	0	0	0	0	0	3.3	13667.7
Rwanda 1992	18	22	24	24	25	2	14	24	24	25	0	0	6	12	15	6.2	6469.95
Rwanda 2000	20	24	24	24	25	10	18	21	24	25	0	2	15	20	20	5.8	10155
Rwanda 2005	20	22	27	28	25	14	22	24	24	25	0	10	15	16	20	6.1	10612.1
Rwanda 2007-08	0	0	0	0	0	0	0	0	0	0	0	0	0	0	0	5.5	7431.65
Sao Tome and Principe 2008-09	0	0	0	0	0	0	0	0	0	0	0	0	0	0	0	4.9	3536.47
Senegal 1986	0	0	0	0	0	0	0	3	4	0	0	0	0	0	0	6.4	2065.7
Senegal 1992-93	23	26	27	28	30	0	20	21	24	25	0	0	3	20	20	6	3697.65
Senegal 1997	25	26	27	28	30	0	20	24	24	25	0	0	12	12	20	5.7	4954.32
Senegal 1999	9	20	21	28	25	0	0	0	20	20	0	0	0	0	0	5.2	9084.52
Senegal 2005	23	26	27	28	30	0	16	24	28	25	0	0	15	20	20	5.3	7741.11
Senegal 2008-09	18	18	27	28	25	2	18	21	28	25	0	2	15	20	20	4.9	9354.77
Sierra Leone 2008	0	0	0	0	0	0	0	0	0	0	0	0	0	0	0	5.1	7571.81
South Africa 1998	0	0	24	24	25	0	0	3	24	25	0	0	0	0	0	2.9	12474.2
Sri Lanka 1987	0	0	0	0	0	0	0	0	0	0	0	0	0	0	0	2.7	7672.45
Sudan 1989-90	21	24	24	28	25	0	20	21	24	25	0	0	12	12	20	4.7	6894.16
Swaziland 2006-07	0	2	12	12	15	0	2	6	8	10	0	0	0	0	0	3.9	5236
Tanzania 1991-92	1	26	30	32	30	1	0	24	28	30	0	0	0	0	0	6.2	9030.41
Tanzania 1996	21	24	30	28	30	0	20	27	24	30	0	0	0	12	20	5.8	8713.1
Tanzania 1999	0	4	3	20	20	0	0	3	12	10	0	0	0	0	0	5.6	3760.96
Tanzania 2004-05	14	26	27	28	30	0	18	21	24	25	0	0	0	0	15	5.7	10188.3
Tanzania 2007-08	1	18	24	24	25	0	12	18	24	25	0	0	0	0	0	5.6	8494.78
Tanzania 2010	0	2	24	24	25	0	0	15	16	20	0	0	0	0	0	5.4	9620.2
Thailand 1987	0	0	0	0	0	0	0	0	0	0	0	0	0	0	0	2.2	9046.08
Timor Leste 2009	0	0	15	16	15	0	0	0	0	0	0	0	0	0	0	5.7	11909.7
Togo 1988	11	22	24	24	25	0	2	12	20	20	0	0	0	4	5	6.4	3432.61
Togo 1998	19	20	27	28	30	0	18	24	24	25	0	0	15	16	20	5.2	7939.27
Trinidad and Tobago 1987	0	0	0	0	0	0	0	0	0	0	0	0	0	0	0	3.1	4122.34
Tunisia 1988	0	0	24	28	30	0	0	0	24	25	0	0	0	0	0	4.2	5647.99
Turkey 1993	0	0	27	28	30	0	0	0	28	25	0	0	0	0	0	2.5	10290.8
Turkey 1998	0	0	0	0	30	0	0	0	0	0	0	0	0	0	0	2.6	9351.86
Turkey 2003	0	0	0	0	30	0	0	0	0	0	0	0	0	0	0	2.23	10830.7
Uganda 1988-89	13	18	24	24	25	2	12	12	20	20	0	0	3	8	10	7.4	5102.79
Uganda 1995	13	22	24	24	25	0	18	18	20	20	0	0	0	0	15	6.9	7963.51
Uganda 2000-01	18	20	24	24	25	0	12	21	20	20	0	0	0	8	15	6.9	8422.74
Uganda 2006	20	26	27	28	30	12	20	24	28	25	0	0	0	16	20	6.7	9617.4
Ukraine 2007	0	0	0	0	0	0	0	0	0	0	1	0	0	0	0	1.2	14268.8
Uzbekistan 1996	0	0	0	0	0	0	0	0	0	0	0	0	0	0	0	3.3	3881.88
Vietnam 1997	0	0	0	0	0	0	0	0	0	0	0	0	0	0	0	2.3	7121.4
Vietnam 2002	0	0	0	0	0	0	0	0	0	0	0	0	0	0	0	1.9	7142.85
Yemen 1991-92	21	26	27	28	30	0	22	24	24	25	0	0	18	16	20	7.7	13602.3
Yemen 1997	26	28	27	28	30	24	26	27	28	30	0	18	21	20	20	6.5	11229.2
Zambia 1992	18	22	30	28	30	4	16	18	24	25	0	0	9	8	15	6.5	6668.75
Zambia 1996	22	22	27	28	30	10	16	24	24	25	0	0	9	12	15	6.1	7927.82
Zambia 2001-02	19	24	27	28	30	9	18	18	24	25	0	0	3	4	10	5.9	7905.1
Zambia 2007	14	22	24	24	25	0	14	15	20	20	0	0	0	8	10	6.2	7793.68
Zimbabwe 1988	0	2	0	20	25	0	0	0	12	10	0	0	0	0	0	5.4	4107
Zimbabwe 1994	0	4	21	20	25	0	0	0	20	20	0	0	0	0	0	4.3	6385.76
Zimbabwe 1999	0	4	6	20	20	0	0	0	4	15	0	0	0	0	0	4	6855.78
Zimbabwe 2005-06	0	4	6	20	25	0	0	6	8	15	0	0	0	0	5	3.8	10214.4
